# Supplementary material for: Creating bottom-up RNA transfer vehicles from synthetic protein assemblies
Source: Research Square preprint supplement (doi:10.21203/rs.3.rs-5123765/v1), 2024-10-14
Supplement: Supplementary file 2 [file 85f19f82f6b1d96e8e84a63b.docx]

**Extended Data Fig. 1 | Detailed characterization of fundamental STV domains. a,** Structure and size of the initial assembly domain HE0902. **b,** Design concept of the synthetic budding domain SynL, derived from ESCRT recruiting viral peptides. **c,** Basic STV design containing different budding domains tested in panel d. **d,** HiBiT-based quantification of STV release by fusing different budding domains (mean ± s.d. for n = 6 replicates biological replicates). **e,** Schematic illustration of EGFP mRNA delivery by basic STV construct. **f,** EGFP mRNA delivery into HEK293T cells, mediated by original STV construct with SynL domain, quantified by Flow Cytometry (mean ± s.d. for n = 4 biological replicates).

**Extended Data Fig. 2 | Establishment and validation of the dual Split-Luciferase based screening method. a,** Analysis of HE0902-based STV release by measuring HiBiT signal in the supernatant of producing cells (mean ± s.d. for n = 6 biological replicates). **b,** Quantification ofHE0902-based STV uptake in C-Split-Luc reporter cells by measuring NanoLuc signal in cell lysates (mean ± s.d. for n = 6 biological replicates). **c,** Measurement ofSTV-HE0902 mediated N-Split-Luc mRNA delivery into C-Split-Luc reporter cells by quantifying Firefly Luciferase signal in cell lysates (mean ± s.d. for n = 6 biological replicates). **d,** Flow Cytometry-basedvalidation of Split-Luc screening results by delivering EGFP mRNA into HEK293T cells (mean ± s.d. for n = 3 biological replicates).

**Extended Data Fig. 3 | Additional C8 symmetric assemblies.** Design of additional protein assemblies by running RFDiffusion with C8 symmetry constraints.

**Extended Data Fig. 4 | Screening for improved membrane binding domains. a,** Illustration of STV release by PH domain-dependent binding to the plasma membrane of producer cells. **b,** Structuralalignment of pleckstrin homology domains derived from unrestricted or human/metagenomic restricted FoldSeek search. **c,** Structural similarity of FoldSeek PH domains compared to *Rattus norvegicus* PHPLC𝛿 domain. **d,** Sequence similarity of FoldSeek PH domains compared to *Rattus norvegicus* PHPLC𝛿 domain. **e,** Schematicworkflow for measuring release, uptake, and RNA delivery efficiency of STVs containing different membrane binding domains. **f,** Quantification of the release of STV variants by measuring HiBiT signal in producer cell supernatant (mean ± s.d. for n = 6 biological replicates). **g,** Quantification of STV uptake in Split-Luc reporter cells by measuring NanoLuc signal from reconstituted LgBiT/HiBiT in cell lysate (mean ± s.d. for n = 6 biological replicates). **h,** Quantification of RNA transfer efficiency by measuring Firefly luciferase signal in transduced Split-Luc reporter cell lysate (mean ± s.d. for n = 6 biological replicates). **i,** Subcellular localization of STVs with different membrane binding domains, determined by immunostaining of STVs in transfected producer cells (scale bar: 10 µm). **j,** Flow Cytometry analysis of STV’s MBD requirement by EGFP delivery into HEK293T cells (mean ± s.d. for n = 3 biological replicates). **k,** Flow Cytometry-based validation of screening results by delivering EGFP into HEK293T cells with STVs containing different PH domains (mean ± s.d. for n = 3 biological replicates).

**Extended Data Fig. 5 | Analysis of purity and particle parameters of STV-C8. a,** Characterizing the protein content of purified STV-C8 particles bySilver Stain and Western Blot. **b,** Analysis of purified STV-C8 particle size by DLS in triplicates (red and blue). **c,** Summary of STV-C8 particle characteristics in comparison to LNPs.

**Extended Data Fig. 6 | Categorical analysis of RNA and protein content of STV-C8(EGFP). a,** GO term analysis ofat least 3-fold depleted mRNAs in STV-C8 particles. **b,** GO term analysis ofat least 3-fold enriched proteins in STV-C8 particles.

**Extended Data Fig. 7 | Programming of STV-C8 cell-type specificity with AI-designed minibinders. a,** AlphaFold2 structural prediction of IL7Rɑ minibinder bound to its target receptor. **b,** Transduction efficiency of IL7Rɑ+/EGFR+ or double-positive HEK293T cells with minibinder-equipped STV-C8 particles, containing EGFP mRNA (Unpaired Student’s t-test, **P < 0.01, ***P < 0.001, mean ± s.d. for n = 6 biological replicates). **c,** Flow Cytometry analysis of EGFP expression in IL7Rɑ+/EGFR+ or double-positive HEK293T cells, transduced with STV-C8(EGFP) that were equipped with both IL7Rɑ and EGFR minibinders simultaneously.

**Extended Data Fig. 8 | Characterization of STV-C8 packaging capacity, toxicity, and production conditions. a,** Flow Cytometry-based analysis of cells transduced with STV-C8, co-packaging EGFP mRNA of 1 kb constant length and mRuby3 of varying 3’UTR lengths (mean ± s.d. for n = 6 biological replicates). **b,** Analysis of Annexin V positive cells by Flow Cytometry. Cells were transduced with EGFP mRNA-containing vehicles in sufficient concentration to reach 50-60% EGFP+ cells in each condition (mean ± s.d. for n = 3 biological replicates). **c,** Measurement of N-Split-Luc RNA transfer into Split-Luc reporter cells after 7 d of STV-C8 storage at different temperatures (Unpaired Student’s t-test, *P < 0.05, mean ± s.d. for n = 4 biological replicates)**. d,** Schematic workflow to optimize plasmid amounts for STV-C8 release, uptake, and RNA delivery efficiency. **e-g,** Comparing STV-C8 release (HiBiT assay in supernatant), STV-C8 uptake (NanoLuc assay in target cell lysate), and RNA transfer (Firefly assay in target cell lysate) upon transfection of different amounts of cargo, packaging and fusogen plasmids (mean ± s.d. for n = 3 biological replicates). **h,** Summary of tested plasmid amounts and ratios.

**Extended Data Fig. 9 | Further characterization of RPE spheroid and lung cell models. a,** Imaging of STV-C8(EGFP) treated RPE spheroids (scale bar: 100 µm). **b,** Confocal microscopy imaging of STV-C8(EGFP) treated and immunostained spheroid slices. (scale bar: 100 µm). **c,** Imaging of TLR reporter cells 3 d after treatment with STV-C8 vehicles containing CRISPR gene editing systems (scale bar: 50 µm). **d,** RT-qPCR characterization of the lung-specific AT2 marker gene and ACE2 in iAT2 differentiated cells (mean ± s.d. for n = 3 biological replicates)

**Extended Data Fig. 10 | Additional analysis of STV-C8 whole-body tissue distribution. a,** Light-sheet imaging of cleared and signal-enhanced mouse body, treated with STV-C8(EGFP), 72 h post i.v. injection. **b,** Magnified upper and lower body parts of panel a (scale bar: 2 mm). **c,** Imaging of lung and liver tissues of an independently treated mouse, 24 h post i.v. injection (scale bar: 200 µm).
